# Supplementary material for: Comparative Mitogenome Analyses Uncover Mitogenome Features and Phylogenetic Implications of the Reef Fish Family Holocentridae (Holocentriformes)
Source: MDPI journal article supplement (doi:10.3390/biology12101273), 2023-09-22
Supplement: s1 [file s1]

Sargocentron\_caudimaculatum -----  
 Sargocentron\_spiniferum -----  
 Sargocentron\_melanospilos -----AACCTCCA  
 Sargocentron\_rubrum -----ACTCCA  
 Neoniphon\_sammara -----TTATATAAT  
 Sargocentron\_diadema -----  
 Sargocentron\_punctatissimum -----  
 Neoniphon\_opercularis -----ATCTACAACAACTATC  
 Myripristis\_kuntee -----ACTTTTCAGACAT  
 Myripristis\_violacea -----ATTTTCAGACAT  
 Myripristis\_murdjan -----GTTCAACAGACAT  
 Myripristis\_berndti -----TCCAACAGACAT  
 Myripristis\_vittata -----TTTTTATACAT  
 Ostichthys\_japonicus CTTCCAGAATAAATGCCACACATCTATTTATTAATGCGGTTGTAGACAT

Sargocentron\_caudimaculatum -----AACTACG--CCAGCCAAA-TTAAGAGAAAACATACGAGTAACA  
 Sargocentron\_spiniferum -----ACTACG--CCACACAAA-TTAAGAGAAAACATACGAGTGATA  
 Sargocentron\_melanospilos AACAACCACACCG--ACACATAAAA-ATAAGGGCAAACACTCGAACACG  
 Sargocentron\_rubrum AACAACCACACCG--ACACATAAAA-ATAAGGGCAAACACTCGAACACG  
 Neoniphon\_sammara ATTATTTACCCCAATCTATAGCTAC-AAAAGAGAAAACCCCAAGCGACA  
 Sargocentron\_diadema -----ACTTTAA-AAACCTCAA-CTTAAGGAAAAGCCTCGAGCGACA  
 Sargocentron\_punctatissimum ---ATTTCCACGACCTTATCAAACCTAAAGGGAATTTCCCGACAATA  
 Neoniphon\_opercularis TGTAATCTTTACACAATTTTATAGTTTGACGGGAAAAGTCCAAGTAGCG  
 Myripristis\_kuntee ATATACAATATTACCACATACTG-TACTTAAAAACAATACACCCAATGTTT  
 Myripristis\_violacea ATATACAATATTACCATATACTG-TACTTAAAAACAATACACCCAATGTTT  
 Myripristis\_murdjan ATATATAATATTACCATATATTG-TACT-AAAACATTACATGTAATGCTC  
 Myripristis\_berndti ATATACAATATTACCATATATTG-TACT-AAAACATTACATGTAATGCTC  
 Myripristis\_vittata ATATACAATATCACCATATAATGATATCAAGTGCATTAATGTAATGCTT  
 Ostichthys\_japonicus ATATGTATTATTACCATACATTTATATTAACATATAATATGTAATGCTT

\*

Sargocentron\_caudimaculatum CGCA--ATGCTATGTATT--AACACCATTTCGT-CGGTACACACCATTTCAG  
 Sargocentron\_spiniferum CGCA--ATGCTATGTATT--AACACCATTTCGT-CGGTACACACCATTTCAG  
 Sargocentron\_melanospilos CCAAC-GCGCTATGTATT--TACACCATTAT-TGGTGTAAACCATACAG  
 Sargocentron\_rubrum CCAAC-GCGCTATGTATT--TACACCATTAT-TGGTGTAAACCATACAA  
 Neoniphon\_sammara ATAAC-TAACTATGTATT--TACACCATATAT-TGCTATACAATCCACAG  
 Sargocentron\_diadema AC-AT-CCGCTATGTATTA-TACACCATATAT-TTATATTAACCATTTCAG  
 Sargocentron\_punctatissimum AGATTTGAGCTATGTATT--ATCACCATACAA-TTATATTAACCATACAG  
 Neoniphon\_opercularis AATAC-AACTATGTATT--TACACCATATAT-TGATATTAACCCACAG  
 Myripristis\_kuntee TAAATACA-GTATATGTATTTACACCATATCA-TTATATTAACCATTCAA  
 Myripristis\_violacea TAAATACA-GTATATGTATTTACACCATACCA-TTATATTAACCATTCAA  
 Myripristis\_murdjan TCAAAACATACATATGTAATAACACCATAACGCTTATATTAACCATTTCAG  
 Myripristis\_berndti TTAAGACATACATATGTAATAACACCATAACATTTATATTAACCATTCAA  
 Myripristis\_vittata ATAAACATAATATATGTTATTTACCATTAAA-TTATTTAACCATTCAA  
 Ostichthys\_japonicus AAGGACA-AATATATGTATTATAACCATTGAT-TTATATTAACCATTCAA

\*\* \* \*                   \*\*\*\*\*                   \*                   \*                   \*\*

Sargocentron\_caudimaculatum  
Sargocentron\_spiniferum  
Sargocentron\_melanospilos  
Sargocentron\_rubrum  
Neoniphon\_sammara  
Sargocentron\_diadema  
Sargocentron\_punctatissimum  
Neoniphon\_opercularis  
Myripristis\_kuntee  
Myripristis\_violacea  
Myripristis\_murdjan  
Myripristis\_berndti  
Myripristis\_vittata  
Ostichthys\_japonicus

GTAATACTA-----TCG-ACTAATATA--AATTTTACATAAACCATTA--  
GTAATACTA-----TCG-ACTAAATCA--AACTTTACATAAACCATTA--  
GTAATATTACAATATTC-ATGATTCCA--CATAGTACATTTTAAATTAC-  
GTAATATTACAATATTC-ATGATTCCA--CATGGTACATTTTAAATTAC-  
GTAATACTAGTTAACTA-AATATATTT--CATAATACATTTATATTTACC  
GTAATACTAAATTATGATATAATTGTA--CATAAACCGTTATTGTAA--  
GTAATACTAG-----TAAACCTTAAT--TATTTTACACACAAATACAT-  
GTAATACTAATAAATATGCTTAATATTTGCATAATACATATTAATAATA  
GAAGTACA-TTAAATG-CTTAATTT-TACATAATACATTC-AAATCTT-  
GAAATACA-TTAAATG-CTTAATTT-TACATAATACATTC-AAATCTT-  
GGAACAGA-TAGAAACG-CTTAATTT-CCCATAAGACATTTCAAGTCC-  
GGAATGGAGTTAAAACG-CTTGATCTATCCATAAGACATTT-AAACTTT-  
GGAATAAA-TGCGACCT-CATAATCT-TACATTATACATTA-ATACTCT-  
GAAATAAC-AGTCAAGT-AA-AACAT-TACATAATACA--A-TTACATA-  
\* \* \* \* \*

Sargocentron\_caudimaculatum  
Sargocentron\_spiniferum  
Sargocentron\_melanospilos  
Sargocentron\_rubrum  
Neoniphon\_sammara  
Sargocentron\_diadema  
Sargocentron\_punctatissimum  
Neoniphon\_opercularis  
Myripristis\_kuntee  
Myripristis\_violacea  
Myripristis\_murdjan  
Myripristis\_berndti  
Myripristis\_vittata  
Ostichthys\_japonicus

AA-ATATAAAATATTGA-----ATTCTAAAGTAACGGGA---CCATA-T  
AA-ATATAAAATATTGA-----ATTCTAAAGTAACGAGA---CCATT-T  
AA-GTATGAAGACATAA-----AAATGATATCAAAGGAA---ATATGGT  
AA-GTATGAAGACATAA-----GAATGGTATCAAAGGAA---ATATGGT  
GA-GAACGGGAACATAAC-----AAGTTAAATCAAGGAAATTTCCCTTAA  
AA-ATCCATAAATATCAT-----GAATTCAGTGACGGGA---CCATA--  
TG-GTTTAAATAGATCAC-----CATGCGAATAGTATGAA--AGTATGTT  
AATATACATAAATAAATTAATTACAGACTAACATTAAGATTATTTATGAG  
---TATTTTCATATATAAT-----CAATTCAAGGAA----TATAAT  
---CATTTTCATATAAT-----TAATTCAAGGAA----TATAGC  
---AGCCTCAGGCA-GATA-----CTGATTTAAGAGA----TA-AGT  
---AGCTCCAGGCATGACA-----CTGATTTAAGAGA----TA-AGT  
---TTATTCACCCCAGAT-----ACTCATCATC----CACTGT  
---TTCATAACCATTTCGT-----AGTAA--AAT----AACTGT  
\* \* \* \* \*

Sargocentron\_caudimaculatum  
Sargocentron\_spiniferum  
Sargocentron\_melanospilos  
Sargocentron\_rubrum  
Neoniphon\_sammara  
Sargocentron\_diadema  
Sargocentron\_punctatissimum  
Neoniphon\_opercularis  
Myripristis\_kuntee  
Myripristis\_violacea  
Myripristis\_murdjan  
Myripristis\_berndti  
Myripristis\_vittata  
Ostichthys\_japonicus

ACTTGA-----AATATACA-----ACTAAAAAA  
ACTTGA-----AATAACA-----ACTAAAAATA  
TCGTAA-----AATCAAGA-----CCTAGCATAA  
TCGTAA-----AATCAAGA-----TCTAGCATAA  
AAGTAA-----GTTAAGA-----CCGAGCTATT  
---TAT-----AATAAAAT-----TTTAACAGAT  
TGAAAG-----ATTTAAGA-----CCGAACACAT  
TCTTAACCAATATACAAGTATTTAATAGACATATATTATTTCTACTGAAT  
ACTAGT-----AAACTCCACA-----CCTAACATAA  
ACTAGT-----AAACTCCACA-----CTTAACATAA  
ACCAGA-----ACACA--AGA-----CCTAACAGGA  
ACTATA-----AAATA--AGA-----CCTAACAAATG  
ATACAC-----GGATTTAAGA-----CCTAACACA-  
AACCAA-----AAATTTAAGA-----CCTAACACTT  
\* \* \* \* \*

Sargocentron\_caudimaculatum  
Sargocentron\_spiniferum  
Sargocentron\_melanospilos  
Sargocentron\_rubrum  
Neoniphon\_sammara  
Sargocentron\_diadema  
Sargocentron\_punctatissimum  
Neoniphon\_opercularis  
Myripristis\_kuntee  
Myripristis\_violacea  
Myripristis\_murdjan  
Myripristis\_berndti  
Myripristis\_vittata  
Ostichthys\_japonicus

TGAAATCA--AATGGCAG--ATATACCAAGTAAT-CACCATTACAAGTGA  
TGAAATCA--AATAGCAG--ATATACCAAGTAAC-CACCATTACAAGTGA  
AGAAATCAT-GGCCAAAG--ATATACCAAGTCCC-CACCATATTA--TGA  
AGAAATCAT-GGCCAAAG--ATATACCAAGTCCC-CACCATACCTA--TGA  
CAAACCTTATAAGATAAAG--ATATACCAAGTCCC-CAACATCTCGTCATA  
T-ATATCATCAGTCA-AG--ATATACCAAGTAAT-CCACATCCTGTTATA  
TTAATTCATCAGTTT-AG--ATATACCAAGTAAT-CAACATTCCTATAATA  
TGAACCTACAAGTAACAAGAACGTACCAAGTAACTCAACATCCCCTTATG  
AAGTTATTTTAAAC--CAG--ATATACCAAGTAAT-CACCATTCATTTC  
CAATTATTTTAAAC--CAG--ATATACCAAGTAAC-CACCATTCCTATTC  
AGAAGAAATCGATTGCAC--ATATACCAAGTACT-CAACAATCTATTT-A  
GAAAGAAATCGATTGCAT--ATATACCAAGCACT-CAACAACCTATTT-A  
ATATTCATTAGTC--AAG--ATATACCAAGCACC-CAACATCCGGCC---  
AAACCCATTAGTC--AAG--ATATACCACGTACC-CACCATCCCCTT---

\* \* \* \* \* \* \* \*

Sargocentron\_caudimaculatum  
Sargocentron\_spiniferum  
Sargocentron\_melanospilos  
Sargocentron\_rubrum  
Neoniphon\_sammara  
Sargocentron\_diadema  
Sargocentron\_punctatissimum  
Neoniphon\_opercularis  
Myripristis\_kuntee  
Myripristis\_violacea  
Myripristis\_murdjan  
Myripristis\_berndti  
Myripristis\_vittata  
Ostichthys\_japonicus

AAATCACAT--TTTTAATGTAGTAAGAAACCACCAAAG-AATGATTACTA  
AAATCGCACCATATTAATGTAGTAAGAAACCACCAAAG-AATGATTACTA  
GATTAAAGGAATCTTAATGTAGTAAGAGACCACCAAAG-AATGATTCTA  
GATTGAAGGAATCTTAATGTAGTAAGAGACCACCAAAG-AATGATTCTA  
AAATT-CAGAACCTTAATGTAGTAAGAAACCACCAAAG-TTTGATTCCTG  
AAACTTAACAT-TTAATGTAGTAAGAAACCACCAAAG-ATTGATTCCTT  
TCTCTACAATAT-TTAATGTAGTAAGAAATCACCACCAAAG-TTTGATTCCTT  
GATTT--AGAATCTTAATGTAGTAAGAAATCACCACCAAAG-TTTGATTCCTA  
AGATCAAAAT-C-TGGATGCAGTAAGAAACCACCAAAG-GGTGATTCCTG  
AGATCAAAAT-C-TGGATGCAGTAAGAAACCACCAAAG-GGTGATTCCTA  
GAATAAGAATAT-TTAATGTAGTAAGAAACCAGCAATC-GGTGATTCCTG  
AAATAAGAATAT-TTAATGTAGTAAGAAACCAGCAATC-GGTGATTCCTC  
AAGAACAATAT-TTAATGTAGTAAGAAACCACCAAAG-GGTGATTCCTA  
GAACACAAATTT-TTAATGTAGTAAGAAACCACCAAAG-GGTGATTCCTA

\* \* \* \* \* \* \* \*

Sargocentron\_caudimaculatum  
Sargocentron\_spiniferum  
Sargocentron\_melanospilos  
Sargocentron\_rubrum  
Neoniphon\_sammara  
Sargocentron\_diadema  
Sargocentron\_punctatissimum  
Neoniphon\_opercularis  
Myripristis\_kuntee  
Myripristis\_violacea  
Myripristis\_murdjan  
Myripristis\_berndti  
Myripristis\_vittata  
Ostichthys\_japonicus

AATGCATTATA-TTCTTGATGGTCAGGGACAA-TAGAC-TGTGGGGGTA-  
AATGCATTGTA-TTCTTGATGGTCAGGGACAA-TAGAC-TGTGGGGGTA-  
AATGCATACGG-TTCTTGATGGTCAGGGACAA-TA-AT-TGTGGGGGTT-  
AATGTACACGG-TTCTTGATGGTCAGGGACAA-TA-AT-TGTGGGGGTT-  
AATGCATGCGAGTTAATGATGGTCAAGGACAAATAAAA-TGTGGGGGTA-  
AATGCATACTA-TTATTGATGGTCAGGGACAA-TAACA-TGTGAGGGTT-  
AATGCATATTA-TTCGTGATAGTCAAGGACA--TCAAT-CGTGAGGGTA-  
AATGCATATGCTTTAATGATAATCAAGGGCAAGCACT-AACAAGAATTT  
AAGGTACTCGG-TTCTTGATAGTCAAGGGCAGGCAAGCATGTGGGGGTA-  
AAGATACTCGG-TTCTTGATGGTCAAGGGCAGGCAAGCATGTGGGGGTA-  
AATGTATATCA-ATCATGATAATCACGGACAATAAAC--CGTGGGGGTA-  
AATGTATATCA-ATCATGATAATCACGGACAATAAAC--TGTGGGGGTA-  
AATGTATCTAG-TCCTTGATGGTCAGGGACAGTAATC---GTGGGGGTT-  
ATTGCATACGG-TTCTTGATGGTCAAGGGACAGAAATTT---GTGGGGGTT-

\* \* \* \* \* \* \* \*

Sargocentron caudimaculatum  
Sargocentron spiniferum  
Sargocentron melanospilos  
Sargocentron rubrum  
Neoniphon sammara  
Sargocentron diadema  
Sargocentron punctatissimum  
Neoniphon opercularis  
Myripristis kuntee  
Myripristis violacea  
Myripristis murdjan  
Myripristis berndti  
Myripristis vittata  
Ostichthys japonicus

-GCACTTAACTGAACTATTCCCTGGCATTGGTTCCCTACTTCAGGGCCATT  
-GCACTTAACTGAATTATTCCCTGGCATTGGTTCCCTAATTTCAGGGTCATT  
-TCACTTGATTGAACTATTCCCTGGCATTGGTTCCCTATTTTCAGGAACA--  
-TCACTTGATTGAACTATTCCCTGGCATTGGTTCCCTATTTTCAGGAACA--  
-GCACTTTGATGAACTATTACTGGCATTGGTTCCCTATTTTCAGGTACAT-  
-TCACTTATTGAAATTATTCCCTGGCATTGGTTCCCTATTTTCAGGGCCATA  
-GCACTTTAATGAATTATTACTGGCATTGGTTCCCTATTTTCAGGGCCAT-  
GGCATTGAAATGAACTATTACTGGCATCTGGTTCCCTATTTTCAGGTCCAT-  
-ACACTT-AATGATCTATTACTGGCATCTGGTTCCCTATTTTCAGGTATAA-  
-ACACTT-AATGATCTATTACTGGCATCTGGTTCCCTATTTTCAGGTACAA-  
-ACACTA-AATGATCTATTACTGGCATCTGGTTCCCTACTTCAGGCACA--  
-ACACTG-AGTGATCTATTACTGGCATCTGGTTCCCTATTTTCAGGTACAA-  
-TCACTT-AGTGAACTATTCCCTGGCATTGGTTCCCTACTTCAGGTCCAT-  
-TCACTT-AGTGAACTATTCCCTGGCATTGGTTCCCTATTTTCAGGTCCAT-  
\* \* \* \* \* \* \* \* \* \* \* \* \* \* \* \* \* \* \* \* \*

Sargocentron caudimaculatum  
Sargocentron spiniferum  
Sargocentron melanospilos  
Sargocentron rubrum  
Neoniphon sammara  
Sargocentron diadema  
Sargocentron punctatissimum  
Neoniphon opercularis  
Myripristis kuntee  
Myripristis violacea  
Myripristis murdjan  
Myripristis berndti  
Myripristis vittata  
Ostichthys japonicus

TAAACTGTAAACAATCCCCATA-TTAATGGACTTCAGCAGGCATAAGTTA  
TAGGTTGCAATGAATCCCCATA-TAAATGAACTTCAGCAGGCATAAGTTA  
TAACAAACCTTTAATCCCC-TA-TATCTCACATTTTCAGGCATAAGTTA  
TAATAAACCTTTAATCCCC-TA-TATCCTACATTTTCAGGCATAAGTTA  
--AACCATAATCAAACCCCAT--TGCATGAACTTTATCAGGCATAAGTTA  
TTAATGAAAAT-ATTCCCCATA-ATAATTAATTTT-CCAGGCATAAGTTA  
---AATACTGTAAGTACCCCTA-AATATGAATTTTATCAGGCATAAGTTA  
AAACACACAAGTATTCCCCATAACAAGTGAATTTTATCAGGCATAGGTTA  
TTTGA-AGCTTCAATCCCCATA-CAATCTCTTTCTAAGGGGCATAAGTTA  
TTTGA-AGTCCCAGTCCCCATA-CAATTTCTTTCTAAAGGGCATAAGTTA  
-TAAA-AGTAATAGTCCCCATA-AAA-CCCCTTCTAAAGGGCATAAGTTA  
ATGAA-GGTAATAACCCCTACA-GAA-CTCTTTCTAAGGGGCATAAGTTA  
AAAA--AGTAAAAACCCCTAAA-AAG-TTCCTACCAGCAGCATAAGTTA  
TAATTTGGTAACATTCCCCATT-TCA-ATGCTCGTTCCAGGCATAAGTTA  
\* \* \* \* \* \* \* \* \* \* \* \* \* \* \* \* \* \* \* \* \*

Sargocentron caudimaculatum  
Sargocentron spiniferum  
Sargocentron melanospilos  
Sargocentron rubrum  
Neoniphon sammara  
Sargocentron diadema  
Sargocentron punctatissimum  
Neoniphon opercularis  
Myripristis kuntee  
Myripristis violacea  
Myripristis murdjan  
Myripristis berndti  
Myripristis vittata  
Ostichthys japonicus

ATGGTGGTAATACATA--TTAACCTTTAC-CCCACATGCCGGGCATTCTC  
ATGGTGGTAATACATA--TTAACCTTTAC-CCCACATGCCGGGCATTCTC  
ATGGTGGTAATACATA--TTAACCTTTAC-CCCCATGCCGAGCGTTCTT  
ATGGTGGTAATACATA--TTAACCTTTAC-CCCCATGCCGAGCGTTCTT  
ATGGTGGTAATACATAAGTTAACCTTTAC-CCCACATGCCGGGCATTCTC  
ATGGTGGTAATACATA--TTAACCTTTAC-CCCACATGCCGAGCACTCTT  
ATGGTGG-AGTACATAA-TAACCTTTAC-CCCACATGCCGAGCATTCTC  
ATGGTGG-AGTACATAA-TAACCTTTAC-CCCACATGCCGAGCATTCTT  
ATGGTGG-CGTACATAA-ATACCCTTTAC-CCCACATGCCGAGCACTCTT  
ATGGTGG-AGTACATAG-TTACCCTTTAC-CCCACATGCCGGGCGCTCTT  
ATGGTGG-AGTACATAG-TCACCCTTTAC-CCCACATGCCGGGCGCTCTT  
ATGGTGG-AGTACATAG-TCACCCTTTAC-CCCACATGCCGGGCGCTCTT  
ATGGTGG-AGTACATA--TTACCCTTTAC-CCCACATGCCGGGCACTCTT  
ATGGTGG-AGTACATA--TTACCCTTTAC-CCCACATGCCGGGCACTCTT  
ATGGTGG-AGTACATA--TTACCCTTTAC-CCCACATGCCGGGCACTCTT  
\*\*\*\*\* \* \* \* \* \* \* \* \* \* \* \* \* \* \* \* \* \* \* \* \* \*

Sargocentron\_caudimaculatum  
Sargocentron\_spiniferum  
Sargocentron\_melanospilos  
Sargocentron\_rubrum  
Neoniphon\_sammara  
Sargocentron\_diadema  
Sargocentron\_punctatissimum  
Neoniphon\_opercularis  
Myripristis\_kuntee  
Myripristis\_violacea  
Myripristis\_murdjan  
Myripristis\_berndti  
Myripristis\_vittata  
Ostichthys\_japonicus

GCC-AAAGGGCAGTTGGTTCTCCTTTTTTAGCTTCCTTTCACCTTACATT  
GCT-AAGGGGCAGTTGGTTTTCTTTTTTAGCTTCCTTTCACCTTACATC  
TCT-AAGGGGCAACGGGTTTTCTTTTT-AGCTTCCTTTCACCTTACATT  
TCT-AAGGGGCAACGGGTTTTCTTTTT-AGCTTCCTTTCACCTTACATC  
TCT-AAGGGACAATTGGTTAATCTTTTTTAGCTTCCTTTCATTTTACATC  
TCCCGAGGGGCAAGGGGTTTTCTTTTT-AGCTTCCTTTCACCTTACATC  
TCC-AAAGGGCAATTGGTATTCTTTTTTAGCTTCCTTTCACCTTACATT  
TCC-AAAGGACAATGGGTTTATAATTTTTTAGCTTCCTTTCACCTTGACATC  
TCT-AAAGGGTAAGGGGTTTTACCTTTTCCGCTCCCTTTCATTTTACATT  
TCT-AAAGGGTAAGGGGTTTTACTTTTTCCGCTCCCTTTCATTTTACATT  
TCT-AAAGGGTAAGGGGTTTTACCTTTTTTCCGCTCCCTTTCATTTTACATC  
TCT-AAAGGGTAAGGGGTTTTACCTTTTTTCCGCTCCCTTTCATTTTACATC  
TCT-AAATGGGCAACGGGTTTTACCTTTTTTCCGCTCCCTTTCATTTTACATC  
TCT-AAAGGGCAAGGGGTTCT-TCTTTTTTAGCTTCCTTTCATTTTACATC  
\* \* \* \* \* \* \* \* \* \* \* \* \* \* \* \* \* \* \* \* \* \* \* \* \* \* \* \* \*

Sargocentron\_caudimaculatum  
Sargocentron\_spiniferum  
Sargocentron\_melanospilos  
Sargocentron\_rubrum  
Neoniphon\_sammara  
Sargocentron\_diadema  
Sargocentron\_punctatissimum  
Neoniphon\_opercularis  
Myripristis\_kuntee  
Myripristis\_violacea  
Myripristis\_murdjan  
Myripristis\_berndti  
Myripristis\_vittata  
Ostichthys\_japonicus

CCGGTGCA--ACGGCAAA-TAACTTAATGAAGGTTGAACATAC-TTTATG  
CCAGTGCA--ACGATAAAAATAACTGAATGAAGGTTGAACATATATTTATA  
CCGGTGCG--GCGGCAGA-AGGTAAACTCAAGGTTGAACAT---TTTCT-  
CCGGTGCA--GCGGCAGA-AGGTAAACTCAAGGTTGAACAT---TTTCT-  
CCCGTGCAATAACGAAAACATTTCAAAGTGAAGGTAGAACAT---TTCCT-  
CCGGTGCA--ATGTCAATAATTAATAAT-AAGGTTGAACATAT-TATCTG  
CCGGTGCG--AAGGATAAAATGATGATTTAAGGTAGTTTCAATA--TCCT-  
CCAGTGCAAAAGCTAAGACAAACGTAAGTTAAGGTTGAACATT--TACCT-  
CCGGTGCA---CCC-TAAAAATGAAAGCCAAGGTAGAACATA--TTCCT-  
CCGGTGCA---CCC-TAAAAATGAAAGTCAAGGTAGAACATA--TTCCT-  
CCGGTGCA---AAG-AAAAATTTAAT-TGGAGGTAGAACATG--TTCCT-  
CCAGTGCA---AAG-GAAGGACTGAA-TGGAAGTGAACATG--TTCCT-  
CCAGTGCA---GCGCTAAGGATAAAAATCAAGGTAGAGCATT--TCCTT-  
CCAGTGCA---GCGCTAAGGTTAACTAATAAGGTAGAACATT--TTCTT-  
\*\* \*\*\*\* \* \* \* \* \* \* \* \* \* \* \* \* \* \* \* \* \*

Sargocentron\_caudimaculatum  
Sargocentron\_spiniferum  
Sargocentron\_melanospilos  
Sargocentron\_rubrum  
Neoniphon\_sammara  
Sargocentron\_diadema  
Sargocentron\_punctatissimum  
Neoniphon\_opercularis  
Myripristis\_kuntee  
Myripristis\_violacea  
Myripristis\_murdjan  
Myripristis\_berndti  
Myripristis\_vittata  
Ostichthys\_japonicus

TTGATATAATAACAAGTAATGTATTCTCCGGGCAGGAATATG----CATG  
ATGGTGTAAATAACAATAATGTTTTCCCGGGCAA-AATGTG----CATG  
-----TGCTTGCAAGGAAATAGTATT----CATG  
-----TGCTTGCAAGGAAATAGTATT----CATG  
-----TGTATTCGGGAGGTAATGGTGGTA-T-CATG  
-----GTGTAAATAAAGAAATA-TGTAT-T-CATG  
-----TGCCAGAGTTAATGATAGTA-TTCATG  
-----TGCATTCGTAAAACGTAAAACAATAATTCATG  
-----TGTAACATAAGATACACTTTT----AATG  
-----TGTAACACAAGACACACTTTT----AATG  
-----TGCT-CGCGTAAAATATGTTT----AGTG  
-----TGCC-CGCATAAA-TACGTTT----AATG  
-----GCACGCACAGGAAATATTATT----CGTG  
-----GCTCGCA-AGCGAATAGTATT----CATG  
\*\*

Sargocentron\_caudimaculatum  
Sargocentron\_spiniferum  
Sargocentron\_melanospilos  
Sargocentron\_rubrum  
Neoniphon\_sammara  
Sargocentron\_diadema  
Sargocentron\_punctatissimum  
Neoniphon\_opercularis  
Myripristis\_kuntee  
Myripristis\_violacea  
Myripristis\_murdjan  
Myripristis\_berndti  
Myripristis\_vittata  
Ostichthys\_japonicus

-GTGTTAAAACCTTATA----TAATCAA-TGAAACCACAAATAGGGATATC  
-GTGTTAAAACCTTATA----TCATTAA-TGAATCCACAAATAAGGATATC  
-GTGGTTAGATTTA-----TTATTAA-AGAA-CCACATTATTAGATATC  
-GTGGTTAGATTTA-----TCGTAA-AGAA-CCACATTATTAGATATC  
TATGAGAAGGTTTGTA---CAATTAA-TGATCCACATATTTAGATATC  
-GTGGAAGATTTG-----TTTTTAA-GAAT--TACATATTAAGATATC  
-ATGATAAACTATT-----CACCAA-ATAA-CCACATATTAGGATATC  
TTAATAAAGGCTTAAAATAATCATTAA-CAAACCACATATTAAGATATC  
-GAGTAAAGGATGGAA-----AGTAAT--ATCTCACATAAAGTAATATC  
-GAGTAAAGATGGAA-----AGTAAT--ATCTGCATAAAGTGATATC  
-GAGGGAAGACTAGAA-----GGAAAGTAGAGTTTGCATGTAATGGATTC  
-GAGGTAGGCTGAAA-----GAAAAGCAAGACTTGCATGTAATGGATTC  
-GAGGTAAAGATTTATA-----AATGAA--AAATCCACATAAATATTTTC  
-GTGGAAGATTTT-----AATTAA--ATAACCACATATTAGGATATC

\* \*\* \*\*

Sargocentron\_caudimaculatum  
Sargocentron\_spiniferum  
Sargocentron\_melanospilos  
Sargocentron\_rubrum  
Neoniphon\_sammara  
Sargocentron\_diadema  
Sargocentron\_punctatissimum  
Neoniphon\_opercularis  
Myripristis\_kuntee  
Myripristis\_violacea  
Myripristis\_murdjan  
Myripristis\_berndti  
Myripristis\_vittata  
Ostichthys\_japonicus

AAGTGCATAAGTAATTTTT-TACCTCGAGCAATTTACCCAATAATATTG  
AAGTGCATAAATAATTTTT-TACCTCGAGCAATTTACCCAATAATATTG  
AAGTGCATAATAATTTTT-TTTTCTAGGCAAAT--ACCTAATA-TATCG  
AAGTGCATAATAATTTTT-TTTTCTAGGCAAAT--ACCTAATA-TATCG  
AAGTGCATAAT--ATTTTT-TTTTCTAGACAAT--ATTCTATGATATTT  
AAGGACATAAATAACTTTTATTAAGTAGGCATAT--ATCTAATA-TATGA  
AAGTGCATAACATATTTCT--TACTAGGCAAAT--ATCCAACA-TATCA  
AAGTGCATAACAATTTTTTATTTCTAGGCAAAT--ATCCTATA-TATCA  
AAGTGCATAATATATTTTATTTCTCAATAGGCAAAG--CTCTAACA-CACCA  
AAGTGCATAATATATTT-TTATTACTAGGCAAAA--CTCTAACA-CACCA  
AAGTGCATAATATATTT-TTACTACCAGGCAAAA--CTCTAACA-CACCA  
ATGTGCATAATACTTTTATTTCTCGACAAAT--CCCTA-TA-TATCA  
ATGTGCATAATAT-TTTTTATTTTCTAGGCAAAT--ACCTAATA-TATTA

\* \* \* \* \* \* \* \* \* \*

Sargocentron\_caudimaculatum  
Sargocentron\_spiniferum  
Sargocentron\_melanospilos  
Sargocentron\_rubrum  
Neoniphon\_sammara  
Sargocentron\_diadema  
Sargocentron\_punctatissimum  
Neoniphon\_opercularis  
Myripristis\_kuntee  
Myripristis\_violacea  
Myripristis\_murdjan  
Myripristis\_berndti  
Myripristis\_vittata  
Ostichthys\_japonicus

CCCCCTTCGTTTTTGCGCGTTAAACCCCC-TACCCCC-AACACCCTA  
CCCCCTCCGTTTTTGCGCGTTAAACCCCC-TACCCCC-AACACCCTA  
CCCC-TCCGTTTTTGCGCGTTAAACCCCC-TACCCCCCTAACACTCCTG  
CCCC-TCCGTTTTTGCGCGTTAAACCCCC-TACCCCCCTAACACTCCTA  
CCCC-CTGGTTTTTGCGCGTTAAACCCCC-TACCCCC-AATACTCCTA  
CCCCCTCGTTTTTGCGCGT-AAACCCCC-TACCCCC-AATACTCCTG  
CCCC-CTGGTTTTTGCGCGT-AAACCCCC-TACCCCC-AACACTCCTG  
CCCC-CTGGTTTTTGCGCGTTAAACCCCC-TACCCCC-TACTCCTG  
CCCC-CTGGTTTTTGCGCGTTAAACCCCC-TACCCCC-TACACCCTG  
CCCC-CTGGTTTTTGCGCGTTAAACCCCC-TACCCCC-TACTCCTG  
CCCC-CTGGTTTTTGCGCGTTAAACCCCC-TACCCCC-TACTCCTG  
CCCC-CTGGTTTTTGCGCGT-AAACCCCC-TACCCCC-TACACCCTG  
CCCC-TCGGTTTTTGCGCGTCAAACCCCC-TACCCCC-TACTCCTG

\*\*\*\* \* \* \* \* \* \* \* \* \* \* \* \* \* \* \* \* \* \* \* \*

Sargocentron\_caudimaculatum  
Sargocentron\_spiniferum  
Sargocentron\_melanospilos  
Sargocentron\_rubrum  
Neoniphon\_sammara  
Sargocentron\_diadema  
Sargocentron\_punctatissimum  
Neoniphon\_opercularis  
Myripristis\_kuntee  
Myripristis\_violacea  
Myripristis\_murdjan  
Myripristis\_berndti  
Myripristis\_vittata  
Ostichthys\_japonicus

AGATCTCTATCACTCCTGTAAACCCCCCGGAAACAGGATAAACCTTCGGG  
AGATCTCTATCACTCCTGTAAACCCCCCGGAAACAGGATAAACCTTCGGG  
AGATCTATATTATTCTGTAAACCCCCCGGAAACAGGA--AAACCTCGAG  
AGATCTATATTATTCTGTAAACCCCCCGGAAACAGGA--AAACCTCGAG  
AGATTCTAATATTCTGTAAACCCCC-GAAAAACAGGACTAAACCTCGAG  
AGATTACTATTATTCTGTAAACCCCCCGGAAACAGGATCTAACCCCGAG  
AGATCGTATTATTCTGTCAAACCCCCCGGAAACAGGAC--AACCTCGAG  
AGATCACTGTCACTCCTGTCAAACCCCC-GAAAAACAGGACTAAACCTCGAG  
AGACCTCTATCACTCCTGTCAAACCCCCCGGAAACAGGAC-AAATCTCAAA  
AGACCTCTATCACTCCTGTCAAACCCCCCGGAAACAGGAC-AAATCTCAAA  
AGATCCTTATCACTCCTGTCAAACCCCCCGGAAACAGGAC-AAACCTCAAA  
AGATCCTTATCACTCCTGTCAAACCCCCCGGAAACAGGAC-AAACCTCAAA  
AGACCTCTATCACTCCTGTCAAACCCCCCGGAAACAGGAA-AAGTCTCAAA  
AGATCTTTTACTCCTGTCAAACCCCCCGGAAACAGGAA-A-GTCTCAAG  
\*\*\* \* \* \*\*\*\*\* \* \*\*\*\*\* \*

Sargocentron\_caudimaculatum  
Sargocentron\_spiniferum  
Sargocentron\_melanospilos  
Sargocentron\_rubrum  
Neoniphon\_sammara  
Sargocentron\_diadema  
Sargocentron\_punctatissimum  
Neoniphon\_opercularis  
Myripristis\_kuntee  
Myripristis\_violacea  
Myripristis\_murdjan  
Myripristis\_berndti  
Myripristis\_vittata  
Ostichthys\_japonicus

CATTG-----CTACTTCCCATCAAATTTGCGTCTATCACAAT----  
CATTG-----CTACTTCAACATCAAATTTGCGTCTATCACAAT----  
TGTTA-----ATTATCCTCCCT--AATTTATGTCTATTACAAT----  
TGTTA-----ATTATCCTCCCT--AATTTATGTCTATTACAAT----  
TATTA-----ACCTATTTAATTCAAATTTATATTTACTTAAATTGTA  
TATTA-----AATATCCCAGCATAAAATTTATGCTTATTATATT---  
TGTTATA-----AGCCTCCCTAATCTAAATTACTCATTTTACATT---  
TACTAAT-----TCACTCCAATTCAAAAATAT-TTTACTTATATT---  
CAGTGTCTTAAATATTTCCAACCACATTTATTTGTGCTTATTTACATT---  
CAGTGTCTTATACTCCAACCACATTTATTTGTGCTTATTTACATT---  
CAGTGTCTTAAATCTTCTAACCACATTTATTTGTGCTTATTTACATT---  
TAGTGTCTATT--TTTTTTAACCACATCTATTTATGCTTATTTACATT---  
TGATA-----TTTAAGTAATTCAATTTATGTATATTTACATT---  
\* \* \* \* \*

Sargocentron\_caudimaculatum  
Sargocentron\_spiniferum  
Sargocentron\_melanospilos  
Sargocentron\_rubrum  
Neoniphon\_sammara  
Sargocentron\_diadema  
Sargocentron\_punctatissimum  
Neoniphon\_opercularis  
Myripristis\_kuntee  
Myripristis\_violacea  
Myripristis\_murdjan  
Myripristis\_berndti  
Myripristis\_vittata  
Ostichthys\_japonicus

---ATTTCAATATTG-CACATTTG-----  
---ATTTCAATATTG-CACATTTT-----  
---ATTTCAATATTA-CACATTTG-----  
---ATTTCAATATTA-CACATTTT-----  
ATAATTACAATATTAACCTATTTAATTCAAATTTATATTTWCTTWAATTG  
---ATTATAATATTG-CACATAG-----  
---ATTATAATATTG-CACATGG-----  
---ATTACAGTATTGCAGCATTACAGTACTACAACATTTTTTATAATG--  
---ATTATAATATTA-CACACAG-----  
---ATTATAATATTA-CACACAG-----  
---ATTATAATATTA-CACACAG-----  
---ATTATAATATTA-CACACA-----  
---ATTATAATATTA-CACACA-----  
---ATTATAATATTG-CACACA-----  
\*\*\* \* \*\*\*\*\* \*



Sargocentron\_caudimaculatum  
Sargocentron\_spiniferum  
Sargocentron\_melanospilos  
Sargocentron\_rubrum  
Neoniphon\_sammara  
Sargocentron\_diadema  
Sargocentron\_punctatissimum  
Neoniphon\_opercularis  
Myripristis\_kuntee  
Myripristis\_violacea  
Myripristis\_murdjan  
Myripristis\_berndti  
Myripristis\_vittata  
Ostichthys\_japonicus

AGATCTCTATCACTCCTGTAAACCCCCCGGAAACAGGATAAACCTTCGGG  
AGATCTCTATCACTCCTGTAAACCCCCCGGAAACAGGATAAACCTTCGGG  
AGATCTATATTATTCTGTAAACCCCCCGGAAACAGGA--AAACCTCGAG  
AGATCTATATTATTCTGTAAACCCCCCGGAAACAGGA--AAACCTCGAG  
AGATTCTAATATTCTGTAAACCCCC-GAAACAGGACTAAACCTCGAG  
AGATTACTATTATTCTGTAAACCCCCCGGAAACAGGATCTAACCCCGAG  
AGATCGTATTATTCTGTCAAACCCCCCGGAAACAGGAC--AACCTCGAG  
AGATCACTGTCACTCCTGTCAAACCCCC-GAAACAGGACTAAACCTCGAG  
AGACCTCTATCACTCCTGTCAAACCCCCCGGAAACAGGAC-AAATCTCAAA  
AGACCTCTATCACTCCTGTCAAACCCCCCGGAAACAGGAC-AAATCTCAAA  
AGATCCTTATCACTCCTGTCAAACCCCCCGGAAACAGGAC-AAACCTCAAA  
AGATCCTTATCACTCCTGTCAAACCCCCCGGAAACAGGAC-AAACCTCAAA  
AGACCTCTATCACTCCTGTCAAACCCCCCGGAAACAGGAA-AAGTCTCAAA  
AGATCTTTTACTCCTGTCAAACCCCCCGGAAACAGGAA-A-GTCTCAAG  
\*\*\* \* \* \*\*\*\*\* \* \*\*\*\*\* \*

Sargocentron\_caudimaculatum  
Sargocentron\_spiniferum  
Sargocentron\_melanospilos  
Sargocentron\_rubrum  
Neoniphon\_sammara  
Sargocentron\_diadema  
Sargocentron\_punctatissimum  
Neoniphon\_opercularis  
Myripristis\_kuntee  
Myripristis\_violacea  
Myripristis\_murdjan  
Myripristis\_berndti  
Myripristis\_vittata  
Ostichthys\_japonicus

CATTG-----CTACTTCCCATCAAATTTGCGTCTATCACAAT----  
CATTG-----CTACTTCAACATCAAATTTGCGTCTATCACAAT----  
TGTTA-----ATTATCCTCCCT--AATTTATGTCTATTACAAT----  
TGTTA-----ATTATCCTCCCT--AATTTATGTCTATTACAAT----  
TATTA-----ACCTATTTAATTCAAATTTATATTACTTTAAATTGTA  
TATTA-----AATATCCCAGCATAAAATTTATGCTTATTATATT---  
TGTTATA-----AGCCTCCCTAATCTAAATTACTCATTTTACATT---  
TACTAAT-----TCACTCCAATTCAAAAATAT-TTTACTTATATT---  
CAGTGTCTTAAATATTTCCAACCACATTTATTTGTGCTTATTTACATT---  
CAGTGTCTTATACTCCAACCACATTTATTTGTGCTTATTTACATT---  
CAGTGTCTTAAATCTTCTAACCACATTTATTTGTGCTTATTTACATT---  
TAGTGTCTATT--TTTTTTAACCACATCTATTTATGCTTATTTACATT---  
TGATA-----TTTAAGTAATTCAATTTATGTATATTTACATT---  
\* \* \* \* \*

Sargocentron\_caudimaculatum  
Sargocentron\_spiniferum  
Sargocentron\_melanospilos  
Sargocentron\_rubrum  
Neoniphon\_sammara  
Sargocentron\_diadema  
Sargocentron\_punctatissimum  
Neoniphon\_opercularis  
Myripristis\_kuntee  
Myripristis\_violacea  
Myripristis\_murdjan  
Myripristis\_berndti  
Myripristis\_vittata  
Ostichthys\_japonicus

---ATTTCAATATTG-CACATTTG-----  
---ATTTCAATATTG-CACATTTT-----  
---ATTTCAATATTA-CACATTTG-----  
---ATTTCAATATTA-CACATTTT-----  
ATAATTACAATATTAACCTATTTAATTCAAATTTATATTTWCTTWAATTG  
---ATTATAATATTG-CACATAG-----  
---ATTATAATATTG-CACATGG-----  
---ATTACAGTATTGCAGCATTACAGTACTACAACATTTTTTATAATG--  
---ATTATAATATTA-CACACAG-----  
---ATTATAATATTA-CACACAG-----  
---ATTATAATATTA-CACACAG-----  
---ATTATAATATTA-CACACA-----  
---ATTATAATATTA-CACACA-----  
---ATTATAATATTG-CACACA-----  
\*\*\* \* \*\*\*\*\* \*



|                             |          |
|-----------------------------|----------|
| Sargocentron_caudimaculatum | -----    |
| Sargocentron_spiniiferum    | -----    |
| Sargocentron_melanospilos   | -----    |
| Sargocentron_rubrum         | -----    |
| Neoniphon_sammara           | TTCACATA |
| Sargocentron_diadema        | -----    |
| Sargocentron_punctatissimum | -----    |
| Neoniphon_opercularis       | -----    |
| Myripristis_kuntee          | -----    |
| Myripristis_violacea        | -----    |
| Myripristis_murdjan         | -----    |
| Myripristis_berndti         | -----    |
| Myripristis_vittata         | -----    |
| Ostichthys_japonicus        | -----    |
