# Supplementary figures and images for: Comparative Mitogenome Analyses Uncover Mitogenome Features and Phylogenetic Implications of the Reef Fish Family Holocentridae (Holocentriformes)
Source: MDPI journal article supplement (doi:10.3390/biology12101273), 2023-09-22

## *Neoniphon opercularis*

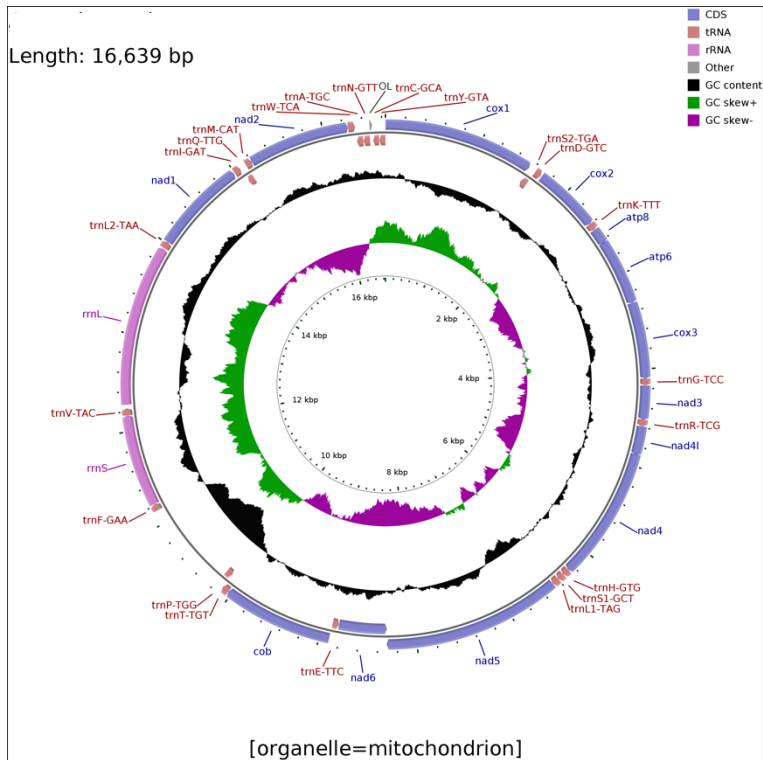

## *Sargocentron caudimaculatum*

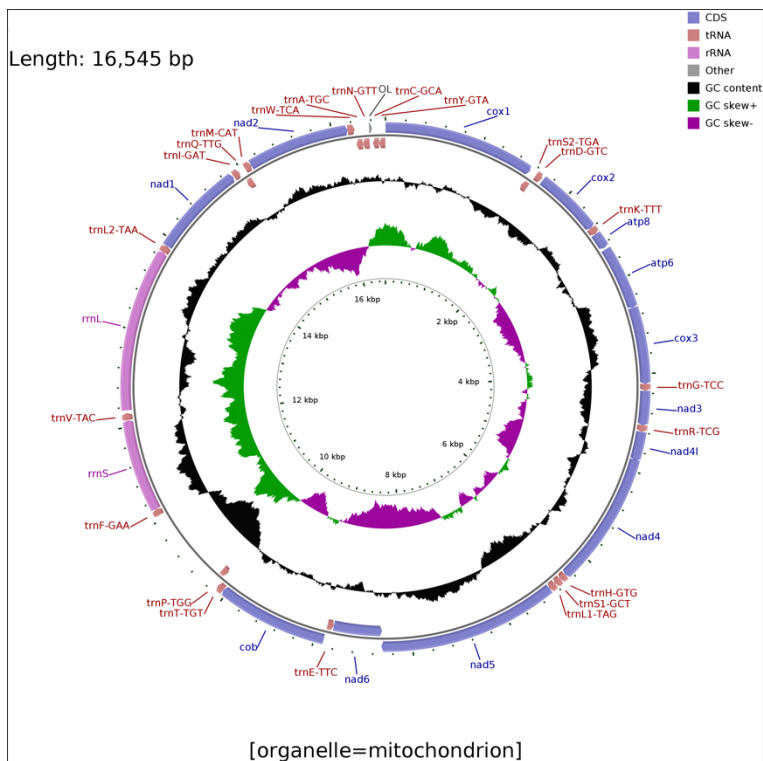

Supplement: s1 [file s1]
